# Supplementary material for: Cause-effect discovery in Hydrometeorological Systems: Evaluation of Causal Discovery methods
Source: Copernicus journal article supplement (doi:10.5194/egusphere-2025-4650), 2025-11-05
Supplement: Supplementary file [file egusphere-2025-4650-RC1-supplement.pdf]

**Review of Manuscript**  
**‘Cause-effect discovery in Hydrometeorological Systems: Evaluation**  
**of Causal Discovery methods.’**

By V. Yadav et al.

Dear Editor,

I have reviewed the manuscript. My conclusions and comments are as follows:

**1. Scope**

The article is within the scope of HESS.

**2. Summary**

In their manuscript, the authors apply and evaluate several methods for causal discovery CD (TCDF, VARLiNGAM, PCMCi+, DYNOTEARS) and, as a benchmark, Pearson correlation coefficients (PCC) in a global hydro-meteorological virtual reality study (GLDAS-simulated timeseries of hydro-meteorological data, where through the process equation structure of the data-generating model the true cause-effect structures are known). They address the following research questions (here formulated in my own words): A) Can CD methods correctly identify process drivers?, B) Can CD methods separate process drivers from non-drivers?, C) Are there particular strengths and weaknesses of CD and correlation-based methods?, D) does parsimonious identification of process drivers provide advantages for model building in the sense of good out-of-sample prediction?.

To address their questions, the authors first define the true causal structure as an DAG-adjacency matrix constructed from the GLDAS process equations and define contingency-table-based measures of agreement between the true adjacency matrix and those returned by the CD and PCC methods: "Recall" for question A, "Matthews Correlation coefficient" for question B, "FPR-TPR" (false positive rate, true positive rate) plots for question C, temporally-out-of-sample performance of ML-based models using only the (random-noise infected) causal variables identified by the CD and PCC methods measured by  $R^2$ , NSE,  $NSE_{mod}$ , KGE, RMSE, MAE for question D. The CD and PCC methods are applied to a large set of globally distributed grid points covering several different Köppen-Geiger climate zones.

Analyzing the results of their experiments, the authors conclude with respect to their research questions A) that PCC identifies most of the true drivers, followed by DYNOTEARS, B) that PCC suffers from high FPR, and overall PCMCi+ and DYNOTEARS do best, C) CD methods outperform PCC mainly because of their ability to weed out false positives, D) ML-models using PCC-identified variables show higher training performance but sharper performance decrease in testing.

**3. Evaluation**

Overall, the manuscript is a timely and relevant contribution to the hydrological community, as it provides an introduction to causal discovery methods, which are not yet well known in the community but show large potential for hydrological system analysis and guiding model building. The manuscript is mainly well written, the experimental design is mainly adequate and the conclusions are mainly supported by the results. The structure does not yet optimally support the messages. In particular, there are several major and minor points that should be addressed

## Major points

### Points related to the definition of causality

- A cause-effect relation in the sense of this manuscript only exists between directly coupled nodes in a DAG. This differs from the colloquial interpretation, where indirect relations, e.g. between precipitation and streamflow, would also qualify as one. To help the reader, a clear definition of cause-effect relation (and how it differs from correlation) should be placed at the beginning of the manuscript, e.g. in the paragraph starting at Line 52.
- There is a fundamental ambiguity in the way how the "true" causal linkages are defined as those that can be extracted from model equations, as is done in the manuscript: Any multivariate equation of the form  $y = f(x_1, x_2, x_3)$  can be re-expressed as a sequence of nested equations, e.g.  $y = f(x_1, g(x_2, x_3))$ , or  $y = f(g(x_1, x_2), x_3)$ , etc. The choice of the nesting and sequential execution is more or less left to the preferences of the programmer. It will not change results, but it will change the resulting DAG, and with it what qualifies as a cause-effect relation, and what not, according to the definition in the manuscript. Any CD performed on a virtual reality derived from a set of process equations will suffer from this ambiguity, and I wonder to which degree this makes results useless.
- Most hydrological models use non-iterative numerical schemes, where a flux equation is followed by a state-updating equation. E.g. outflow from a linear reservoir is calculated as
  - $Q(t+1) = S(t) \cdot k$
  - $S(t+1) = S(t) - Q(t+1) \cdot dt$If I understood correctly from the manuscript, such a process equation structure cannot be represented by a DAG, because  $Q=f(S)$  and  $S = f(Q)$  and hence DAG-based CD methods cannot be applied. If correct, this would be a hindrance for the adoption of CD methods in hydrology, and should be mentioned as a limitation in the discussion or conclusion.
- In their study, the authors use an ideal situation where the full causal structure is perfectly known (see Fig. 2a) to evaluate CD methods. This is fine, but it will also be interesting to hydrologists what the potential of such methods is for system architecture identification. I.e. when only a few observables (usually forcing and target variables) are available, and the size and structure of the underlying system should be learned. I recommend adding a few words (and references) about this matter, e.g. in Sect. 4.4 or 5.
- Out of curiosity: In causality analysis, does the concept of an inhibitor exist? I.e. a variable that would effectively mask an existing causal relationship? For example, assume  $z = x + y$ . If  $x=1$  and  $y=0$ ,  $z=1$ . Also, for  $x=0$  and  $y=1$ ,  $z=1$ . So  $y$  effectively masks the causal dependency of  $z$  and  $x$ . This is not something to be addressed in the manuscript, but I would appreciate a reply.

### Points related to the manuscript structure

- The results are often discussed separately for the different climate zones, or compared among them (e.g. Fig. 3, or Lines 510 pp). This is not reflected in the abstract and in the formulation of the research questions at the end of section 1. I recommend doing so.
- Line 109: Research Question (RQ) 4 is ambiguous: At this point in the manuscript, it is unclear what it means, and later in the manuscript it is used at two places: In Sect. 3.4 and Sect. 3.5. Sect 3.4 essentially addresses RQ 2 for a subsystem, so it should be labelled otherwise. Sect 3.5 addresses RQ 4. I suggest rephrasing RQ 4 to something like "Can CD methods help building parsimonious and robust hydrological models?"
- Sect. 2.5.1 - 2.5.4: Here the order of models differs from that in Table 1 and Sect 3.4. Please harmonize (I suggest keeping the order as in Table 1).
- Sect 2.5.7 should be a separate section 2.6, as it is topically separate from 2.5.1-2.5.6, which are all about CD methods.

- In Sect. 3, results are not only reported but also discussed. I suggest renaming it to "Results and Discussion". Also, I suggest mentioning at the beginning that the main substructure in this section is by the research questions RQ1-RQ4, and also reflecting this in the subsection headers. E.g. "3.1 RQ1: Can CD methods ..."
- Sect. 3.4.6 is a summary statement, and would be better placed later in the manuscript
- Sect. 4: Here the main structure differs from that in Sect. 3. I recommend merging the two, structuring them along the RQs, and moving any parts that go beyond the immediate results and discussion of the experiment to the last section, which could then be named "Summary, Conclusions and Outlook"

#### Points related to manuscript content

- I really like the experiments and analyses related to RQs A-C, but the experiment for RQ D is not convincing. Why should a random error imposed on the identified drivers help distinguishing robust models with good generalization from non-robust models with poor generalization? From the information inequality we know that "information does not hurt", i.e. adding predictors will never worsen predictions. This is always true, and it shows in the superior performance of the PCC-based model in training, but the catch is that with increasing number of predictors, the curse of dimensionality kicks in, the available sample quickly becomes non-representative, overfitting occurs, and out-of-sample performance will drop. So a convincing demonstration of "CD returns fewer drivers than PCC, therefore the training data are more representative, therefore out-of-sample prediction is better" must include sample size. I recommend doing the following: Learn the different ML models (with input as selected by PCC and the CD models) on differently sized training data (from very small to the entire period 2000-2003) and apply on 2004. The CD-based models should do much better for small training sample sizes than the PCC-based.
- Sect 2.5 A description of how PCC was used in the study is missing. Please add, comparable to the descriptions of the CD methods in Sects 2.5.1-2.5.4
- In Sect. 3.5, results are reported for the ANN approach, but in the Appendix C SVR results are also shown. Consider removing them if not relevant, or also discuss them.

#### Minor points

- Line 81: I assume you mean "Time series produced by hydrological systems are ..."
- Line 176: causes in rows and effect in columns: This is opposite to what's shown in Fig. 1.
- Line 211: Slightly misleading. I suggest rephrasing to: "We surveyed various models and their outputs with the ..."
- Line 211 pp: Was global coverage also a criterion? If yes please mention.
- Fig. 2:
  - In a) ,please make clear what are the causes and what are the effects
  - b) - f): Pictures and legend to not match: It is 5 regions, in the text it says six major river basins. Also, the stars in the maps, which I assume depict the grid points, are not nine per map (as stated in the legend).
  - Later in the manuscript, in Fig. 3, are shown for 9 Köppen-Geiger classes and 9 river basins, which does not match the 5 plots in Fig. 2. Please harmonize.
- Line 243: what's k in the equation?
- Line 468: Why did you select the Ganga basin? Please justify
- Fig. 5: Unclear which subplot is for which method. Please add labels
- Fig. 7
  - The metrics are not explained. E.g. what is  $NSE_{mod}$ ?
  - d): If I interpret correctly, testing performance for the CD models expressed by RMSE and MAE is better than for the training period. Is this correct? It could be because testing is in

a dry year, where soil moisture is generally lower, therefore absolute errors are also lower. In any case, please add an explanation to the text.

- The requested changes might be obsolete if the figure is completely changed (see my comment on RQ D)
- Line 729: remove "not"
- 788: Why are the snow-related variables ignored? Please explain.

Yours sincerely,  
Uwe Ehret
